# Supplementary material
Source: PubMed Central journal article supplement (PMC2614441)
Supplement: NIHMS83120-supplement-01.pdf [file NIHMS83120-supplement-01.pdf]

Supplemental Figure 1

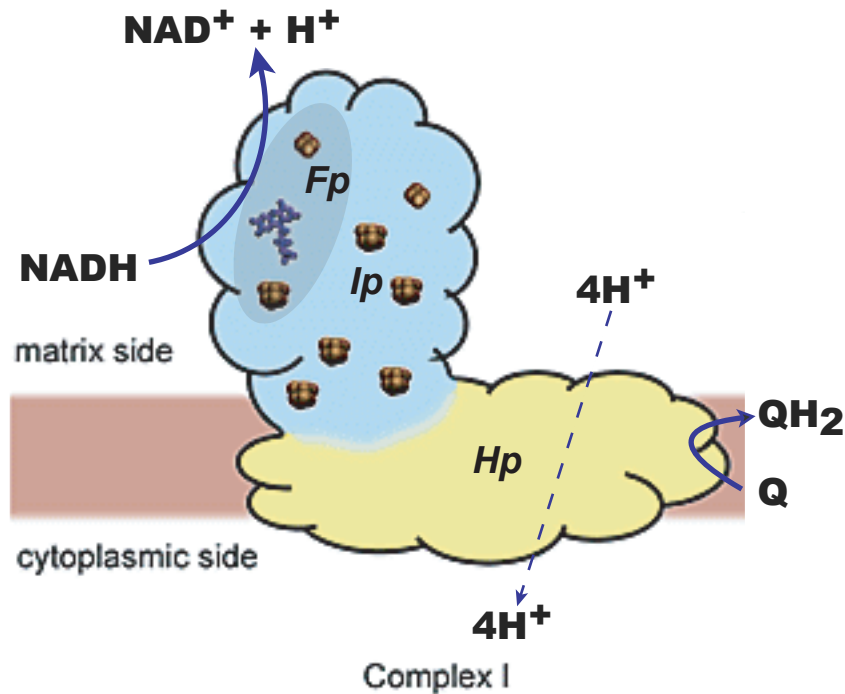

Schematic representation of structure and function of the respiratory complex I. Mammalian complex I has an L-shape structure based on EM analysis. The L-shape model contains two major segments, the peripheral domain and membrane domain. The enzyme complex catalyzes electron transfer from NADH to ubiquinone (Q) and proton translocation. The oval shadow indicates flavoprotein subcomplex (Fp). FMN and iron-sulfur clusters are drawn in dark blue and brown respectively.

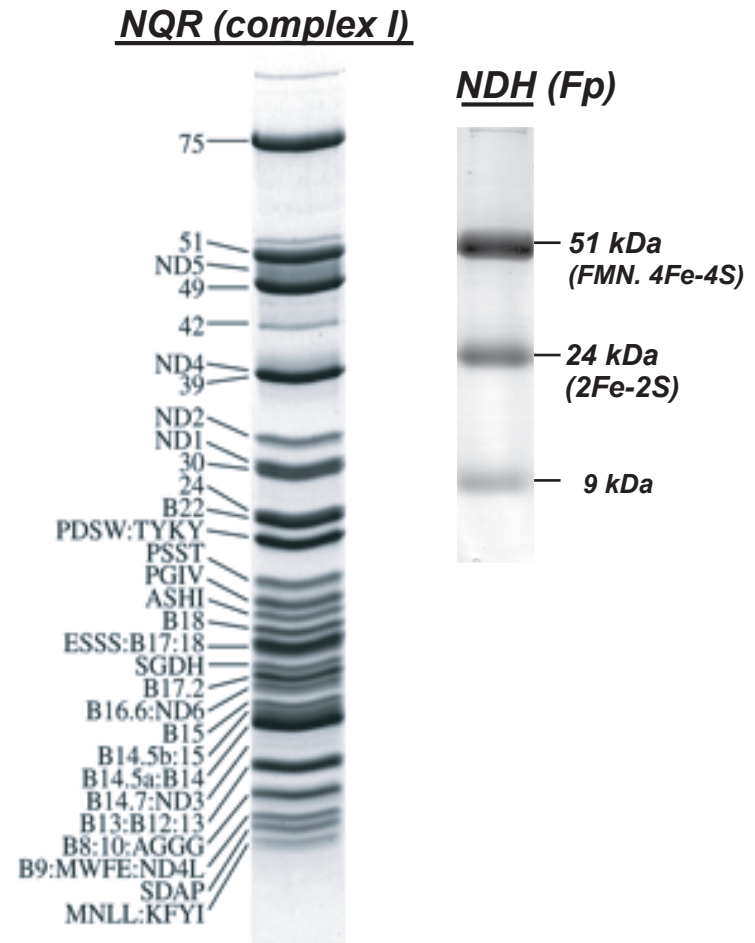

SDS-PAGE of intact bovine complex I (or NQR, ref. 2) hosting 45 subunits and Fp subcomplex (or NDH, ref. 15) hosting 3 subunit. Fp subcomplex was extracted from intact complex I by 9% ethanol at 40 °C.

Supplemental Figure 2

185N A C (187) G S G Y D F D V F196 Chain A

200G A G A Y I C (206) G E E T A L I E S I E G K219 Chain B  
 b5B b6B y13B y12B y11B y10B y9B y8B y7B y6B y5B y4B y3B

$(M+2H)^{2+} = 1101.20$

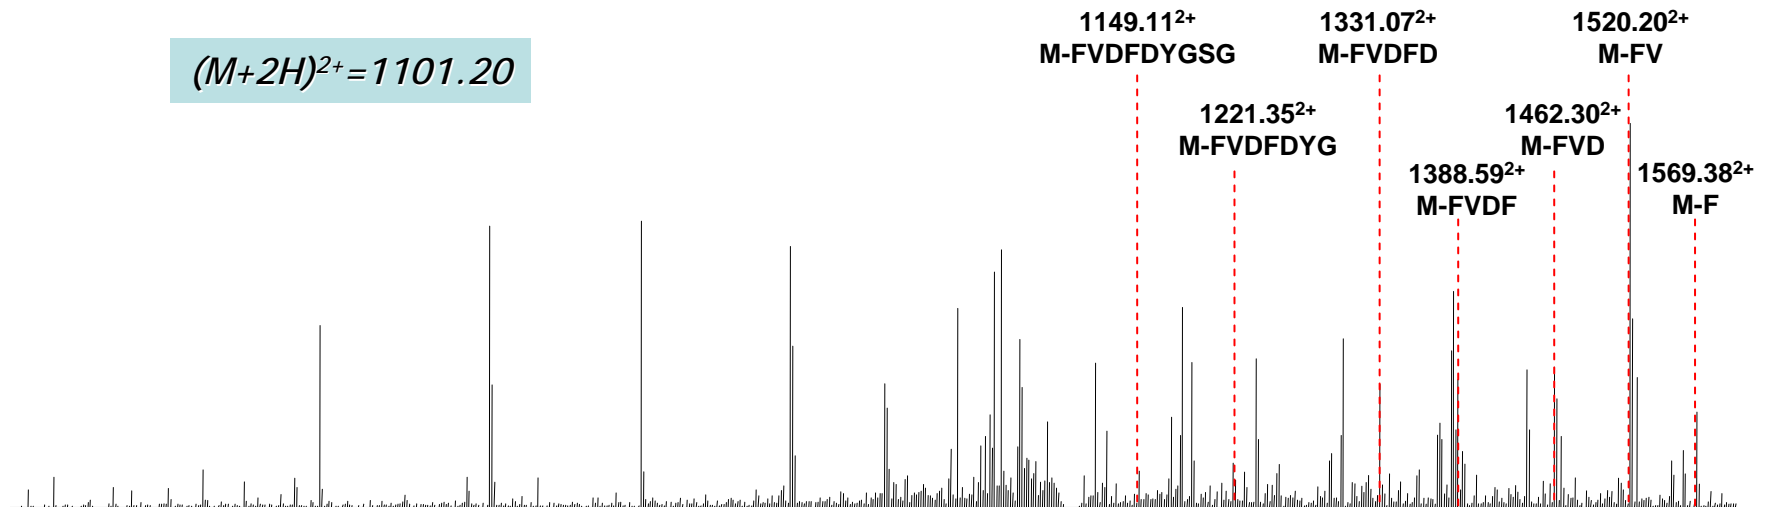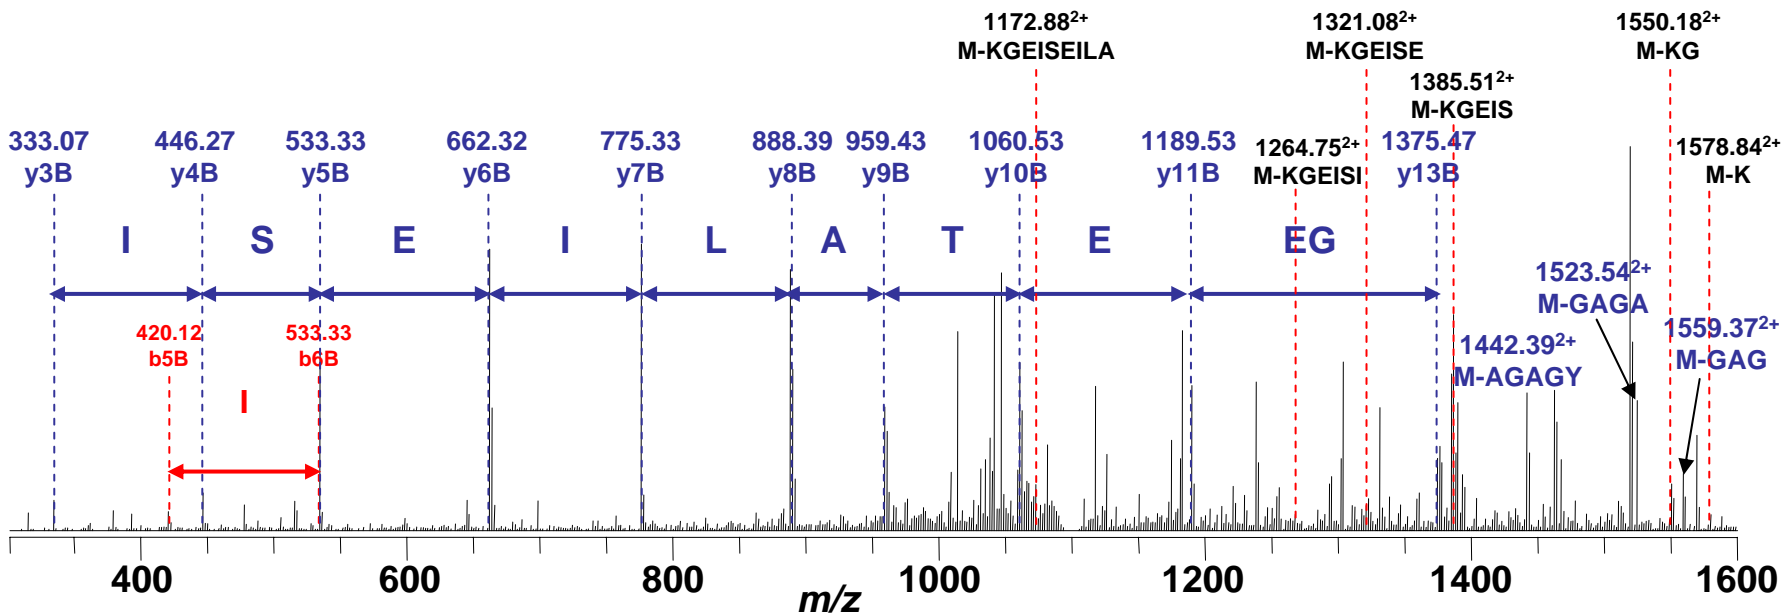

Supplemental Figure 3

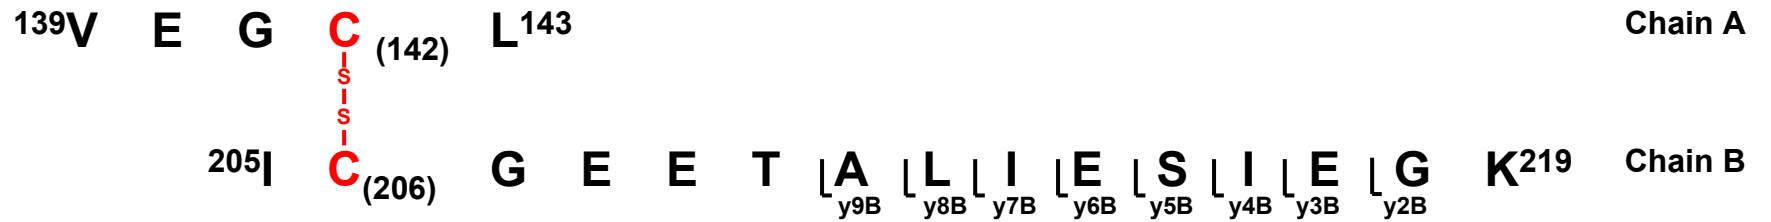

$(M+3H)^{3+} = 703.28$

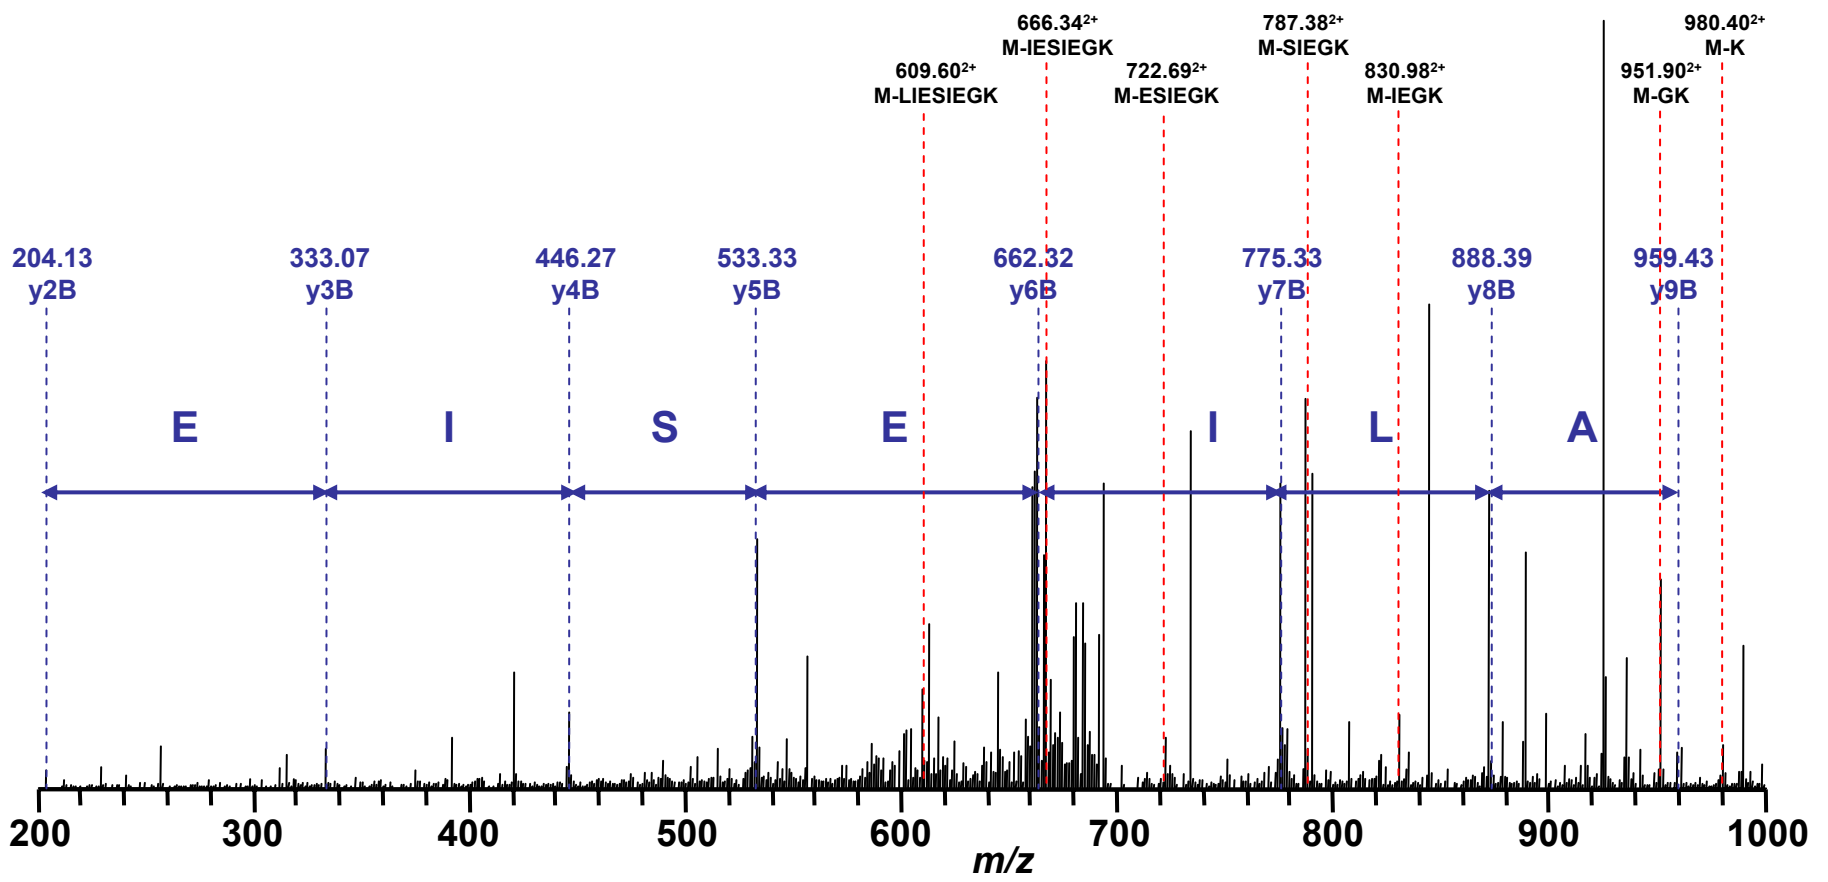

Supplemental Figure 4

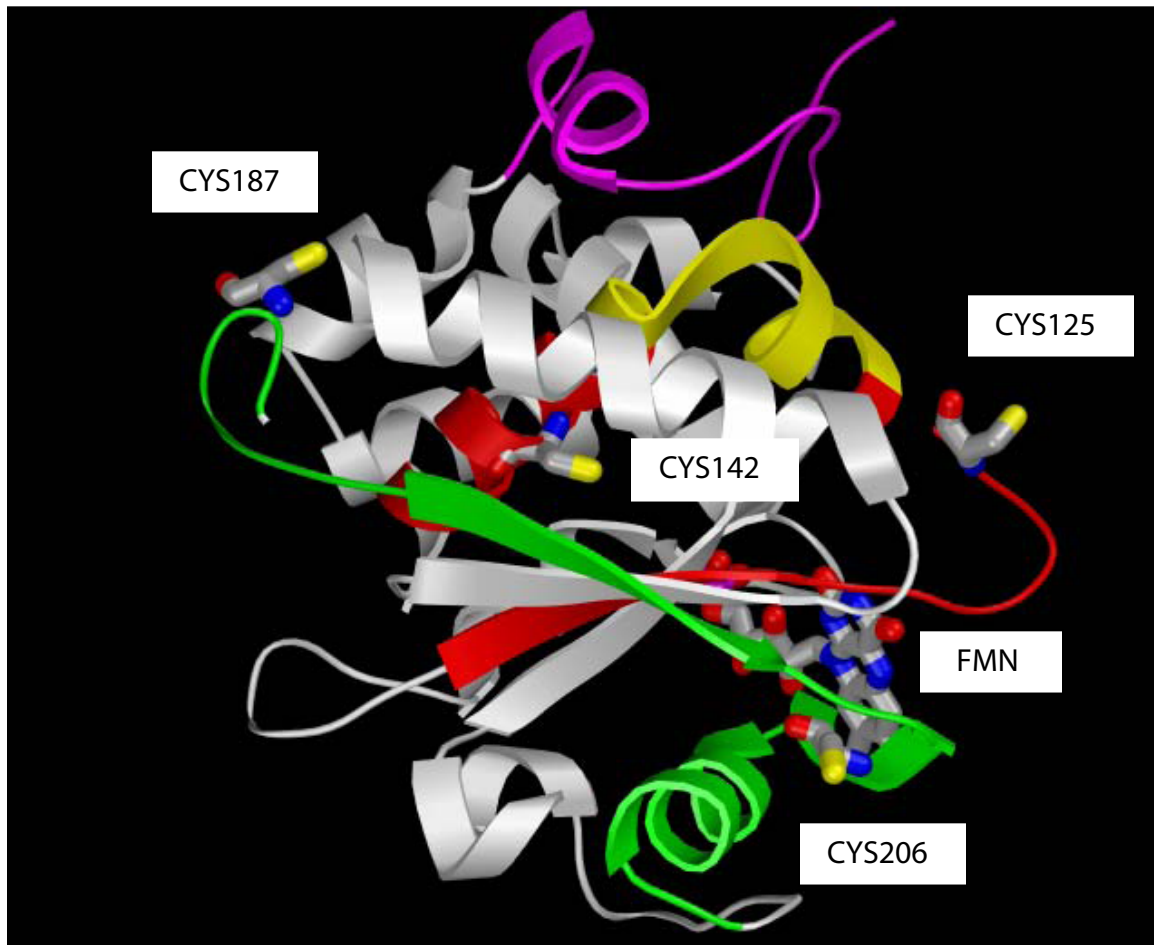

**The ribbon representation of the FMN binding domain of Complex I.** C<sub>125</sub>, C<sub>142</sub>, C<sub>187</sub>, C<sub>206</sub> and FMN are shown in a ball-and-stick atomic model. Magenta ribbon: N-terminal (Glu38-Asp61); 1<sup>st</sup>  $\beta$ -strand red ribbon: Tyr112-Arg128; 1<sup>st</sup>  $\alpha$ -helical red ribbon: Leu138-Arg147; 2<sup>nd</sup>  $\beta$ -strand green ribbon: Asn185-Arg199; 2<sup>nd</sup>  $\alpha$ -helical green ribbon: Gly200-Lys219; yellow helix connecting 1<sup>st</sup>  $\beta$ -strand red ribbon and 1<sup>st</sup>  $\alpha$ -helical red ribbon: <sup>129</sup>EIIRHDPHK<sup>137</sup> (the kink is caused by Pro135).

**Supplemental Table 1** Details of the fragmentation ions for Peptide  $_{112}\text{YLVVNADE}$  GEPGTC $^{125}$ KDR $_{128}$  (Chain A)/ $_{138}\text{LVEGC}^{142}$ LVGGR $_{147}$  (Chain B) (C $_{125}$ -C $_{142}$ ). Observed  $m/z = 956.22^{3+}$ , theoretical  $m/z = 955.8005^{3+}$ .

| Fragmentation Ion | Theoretical $m/z$ | Observed $m/z$  | Mass Error (Da) |
|-------------------|-------------------|-----------------|-----------------|
| b $_{2A}$         | 277.1547 $^{1+}$  | 277.05 $^{1+}$  | -0.1047         |
| b $_{3A}$         | 376.2231 $^{1+}$  | 376.22 $^{1+}$  | -0.0031         |
| b $_{4A}$         | 475.2915 $^{1+}$  | 475.30 $^{1+}$  | 0.0085          |
| b $_{5A}$         | 589.3344 $^{1+}$  | 589.28 $^{1+}$  | -0.0544         |
| b $_{6A}$         | 660.3715 $^{1+}$  | 660.41 $^{1+}$  | 0.0385          |
| b $_{7A}$         | 775.3985 $^{1+}$  | 775.37 $^{1+}$  | -0.0285         |
| y $_{3B}$         | 289.1619 $^{1+}$  | 289.16 $^{1+}$  | -0.0019         |
| y $_{4B}$         | 388.2303 $^{1+}$  | 388.48 $^{1+}$  | 0.2497          |
| y $_{5B}$         | 501.3144 $^{1+}$  | 501.22 $^{1+}$  | -0.0944         |
| M-YLVVNADEGE      | 888.4482 $^{2+}$  | 888.78 $^{2+}$  | 0.6636          |
| M-YLVVNADE        | 981.4802 $^{2+}$  | 981.84 $^{2+}$  | 0.7196          |
| M-YLVVNAD         | 1046.0015 $^{2+}$ | 1046.32 $^{2+}$ | 0.637           |
| M-YLVVNA          | 1103.5150 $^{2+}$ | 1103.85 $^{2+}$ | 0.67            |
| M-YLVVN           | 1139.0335 $^{2+}$ | 1139.25 $^{2+}$ | 0.433           |
| M-YLVV            | 1196.0550 $^{2+}$ | 1196.36 $^{2+}$ | 0.61            |
| M-YLV             | 1245.5892 $^{2+}$ | 1245.89 $^{2+}$ | 0.6016          |
| M-YL              | 1295.1234 $^{2+}$ | 1295.44 $^{2+}$ | 0.6332          |

**Supplemental Table 2** Details of the fragmentation ions for Peptide  $^{185}\text{NAC}^{187}\text{GSGYDFDV FVVR}_{199}$  (Chain A)/ $^{200}\text{GAGAYIC}^{206}\text{GEETALIESIEGK}_{219}$  (Chain B) ( $\text{C}_{187}\text{-C}_{206}$ ). Observed  $m/z = 1219.95^{3+}$ , theoretical  $m/z = 1219.5676^{3+}$ .

| Fragmentation Ion | Theoretical $m/z$       | Observed $m/z$        | Mass Error (Da) |
|-------------------|-------------------------|-----------------------|-----------------|
| Y <sub>3A</sub>   | 373.2558 <sup>1+</sup>  | 373.38 <sup>1+</sup>  | 0.1242          |
| Y <sub>4A</sub>   | 520.3242 <sup>1+</sup>  | 520.45 <sup>1+</sup>  | 0.1258          |
| Y <sub>5A</sub>   | 619.3926 <sup>1+</sup>  | 619.50 <sup>1+</sup>  | 0.1074          |
| Y <sub>6A</sub>   | 734.4196 <sup>1+</sup>  | 734.54 <sup>1+</sup>  | 0.1204          |
| Y <sub>7A</sub>   | 881.4880 <sup>1+</sup>  | 881.58 <sup>1+</sup>  | 0.092           |
| Y <sub>8A</sub>   | 996.5149 <sup>1+</sup>  | 996.54 <sup>1+</sup>  | 0.0251          |
| Y <sub>9A</sub>   | 1159.5782 <sup>1+</sup> | 1159.55 <sup>1+</sup> | -0.0282         |
| Y <sub>11A</sub>  | 1303.6317 <sup>1+</sup> | 1303.67 <sup>1+</sup> | 0.0383          |
| Y <sub>12A</sub>  | 1360.6532 <sup>1+</sup> | 1360.68 <sup>1+</sup> | 0.0268          |
| b <sub>5B</sub>   | 420.1878 <sup>1+</sup>  | 420.38 <sup>1+</sup>  | 0.1922          |
| B <sub>6B</sub>   | 533.2718 <sup>1+</sup>  | 533.42 <sup>1+</sup>  | 0.1482          |
| Y <sub>4B</sub>   | 446.2609 <sup>1+</sup>  | 446.48 <sup>1+</sup>  | 0.2191          |
| Y <sub>5B</sub>   | 533.2930 <sup>1+</sup>  | 533.42 <sup>1+</sup>  | 0.127           |
| Y <sub>6B</sub>   | 662.3355 <sup>1+</sup>  | 662.43 <sup>1+</sup>  | 0.0945          |
| Y <sub>7B</sub>   | 775.4196 <sup>1+</sup>  | 775.49 <sup>1+</sup>  | 0.0704          |
| Y <sub>8B</sub>   | 888.5037 <sup>1+</sup>  | 888.48 <sup>1+</sup>  | -0.0237         |
| Y <sub>9B</sub>   | 959.5408 <sup>1+</sup>  | 959.55 <sup>1+</sup>  | 0.0092          |
| Y <sub>10B</sub>  | 1060.5885 <sup>1+</sup> | 1060.60 <sup>1+</sup> | 0.0115          |
| Y <sub>11B</sub>  | 1189.6311 <sup>1+</sup> | 1189.62 <sup>1+</sup> | -0.0111         |
| Y <sub>12B</sub>  | 1318.6737 <sup>1+</sup> | 1318.62 <sup>1+</sup> | -0.0537         |
| Y <sub>13B</sub>  | 1375.6951 <sup>1+</sup> | 1375.66 <sup>1+</sup> | -0.0351         |
| M-GSGYDFDV FVVR   | 2297.0424 <sup>1+</sup> | 1149.27 <sup>2+</sup> | 0.4898          |
| M-SGYDFDV FVVR    | 2354.0639 <sup>1+</sup> | 1177.56 <sup>2+</sup> | 0.0483          |
| M-DFDV FVVR       | 2661.1807 <sup>1+</sup> | 1331.54 <sup>2+</sup> | 0.8915          |
| M-FDV FVVR        | 2776.2077 <sup>1+</sup> | 1388.88 <sup>2+</sup> | 0.5445          |
| M-DV FVVR         | 2923.2761 <sup>1+</sup> | 1462.38 <sup>2+</sup> | 0.4761          |
| M-VF VVR          | 3038.3030 <sup>1+</sup> | 1519.98 <sup>2+</sup> | 0.6492          |
| M-FV VVR          | 3137.3714 <sup>1+</sup> | 1569.43 <sup>2+</sup> | 0.4808          |
| M-VV R            | 3284.4398 <sup>1+</sup> | 1643.02 <sup>2+</sup> | 0.5924          |
| M-VR              | 3383.5083 <sup>1+</sup> | 1692.55 <sup>2+</sup> | 0.5839          |
| M-R               | 3482.5767 <sup>1+</sup> | 1742.29 <sup>2+</sup> | 0.9955          |
| M-GEETALIESIEGK   | 2282.0005 <sup>1+</sup> | 1141.81 <sup>2+</sup> | 0.6117          |
| M-EETALIESIEGK    | 2339.0220 <sup>1+</sup> | 1170.28 <sup>2+</sup> | 0.5380          |
| M-TALIESIEGK      | 2597.1071 <sup>1+</sup> | 1299.24 <sup>2+</sup> | 0.3252          |
| M-ALIESIEGK       | 2698.1548 <sup>1+</sup> | 1350.08 <sup>2+</sup> | 0.9374          |
| M-LIESIEGK        | 2769.1919 <sup>1+</sup> | 1385.30 <sup>2+</sup> | 0.4003          |
| M-IESIEGK         | 2882.2760 <sup>1+</sup> | 1441.91 <sup>2+</sup> | 0.5362          |
| M-ESIEGK          | 2995.3601 <sup>1+</sup> | 1498.57 <sup>2+</sup> | 0.7721          |
| M-SIEGK           | 3124.4027 <sup>1+</sup> | 1563.40 <sup>2+</sup> | 1.3895          |
| M-EGK             | 3324.5188 <sup>1+</sup> | 1663.42 <sup>2+</sup> | 1.3134          |
| M-GK              | 3453.5613 <sup>1+</sup> | 1727.73 <sup>2+</sup> | 0.8909          |

**Supplemental Table 3** Details of the fragmentation ions for Peptide  ${}_{138}\text{LVEGC}^{142}\text{LVGG}$   $\text{R}_{147}$  (Chain A) (Chain A)/ ${}_{200}\text{GAGAYIC}^{206}\text{GEETALIESIEGK}_{219}$  (Chain B) ( $\text{C}_{142}\text{-C}_{206}$ ). Observed  $m/z = 1004.50^{3+}$ , theoretical  $m/z = 1004.1669^{3+}$ .

| Fragmentation Ion | Theoretical m/z         | Observed m/z          | Mass Error (Da) |
|-------------------|-------------------------|-----------------------|-----------------|
| Y <sub>3A</sub>   | 289.1619 <sup>1+</sup>  | 289.16 <sup>1+</sup>  | -0.0019         |
| Y <sub>4A</sub>   | 388.2303 <sup>1+</sup>  | 388.23 <sup>1+</sup>  | -0.0003         |
| Y <sub>5A</sub>   | 501.3144 <sup>1+</sup>  | 501.42 <sup>1+</sup>  | 0.1056          |
| b <sub>5B</sub>   | 420.1878 <sup>1+</sup>  | 420.38 <sup>1+</sup>  | 0.1922          |
| B <sub>6B</sub>   | 533.2718 <sup>1+</sup>  | 533.34 <sup>1+</sup>  | 0.0682          |
| Y <sub>3B</sub>   | 333.1769 <sup>1+</sup>  | 333.28 <sup>1+</sup>  | 0.1031          |
| Y <sub>4B</sub>   | 446.2609 <sup>1+</sup>  | 446.38 <sup>1+</sup>  | 0.1191          |
| Y <sub>5B</sub>   | 533.2930 <sup>1+</sup>  | 533.34 <sup>1+</sup>  | 0.047           |
| Y <sub>6B</sub>   | 662.3355 <sup>1+</sup>  | 662.34 <sup>1+</sup>  | 0.0045          |
| Y <sub>7B</sub>   | 775.4196 <sup>1+</sup>  | 775.45 <sup>1+</sup>  | 0.0304          |
| Y <sub>8B</sub>   | 888.5037 <sup>1+</sup>  | 888.53 <sup>1+</sup>  | 0.0263          |
| Y <sub>9B</sub>   | 959.5408 <sup>1+</sup>  | 959.53 <sup>1+</sup>  | -0.0108         |
| Y <sub>10B</sub>  | 1060.5885 <sup>1+</sup> | 1060.58 <sup>1+</sup> | -0.0085         |
| Y <sub>11B</sub>  | 1189.6311 <sup>1+</sup> | 1189.61 <sup>1+</sup> | -0.0211         |
| Y <sub>12B</sub>  | 1318.6737 <sup>1+</sup> | 1318.71 <sup>1+</sup> | 0.0363          |
| Y <sub>13B</sub>  | 1375.6951 <sup>1+</sup> | 1375.64 <sup>1+</sup> | -0.0551         |
| M-EETALIESIEGK    | 1692.8196 <sup>1+</sup> | 847.12 <sup>2+</sup>  | 0.4126          |
| M-ETALIESIEGK     | 1821.8622 <sup>1+</sup> | 911.68 <sup>2+</sup>  | 0.49            |
| M-TALIESIEGK      | 1950.9048 <sup>1+</sup> | 976.21 <sup>2+</sup>  | 0.5074          |
| M-IESIEGK         | 2236.0737 <sup>1+</sup> | 1118.80 <sup>2+</sup> | 0.5185          |
| M-ESIEGK          | 2349.1577 <sup>1+</sup> | 1175.38 <sup>2+</sup> | 0.5945          |
| M-SIEGK           | 2478.2003 <sup>1+</sup> | 1239.89 <sup>2+</sup> | 0.5719          |
| M-EGK             | 2678.3164 <sup>1+</sup> | 1339.84 <sup>2+</sup> | 0.3558          |
| M-GK              | 2807.3590 <sup>1+</sup> | 1404.41 <sup>2+</sup> | 0.4532          |
| M-GAGAYI          | 2478.2215 <sup>1+</sup> | 1239.89 <sup>2+</sup> | 0.5507          |
| M-GAGAY           | 2565.2324 <sup>1+</sup> | 1296.43 <sup>2+</sup> | 0.5467          |
